# Supplementary material for: Disinfection of Water Borne Pathogens <em>Escherichia coli</em> and <em>Staphylococcus aureus</em> by Solar Photocatalysis using Sonochemically Synthesized Reusable Ag@ZnO Core-shell Nanoparticles
Source: Preprints.org preprint supplement (doi:10.20944/preprints201705.0041.v1), 2017-05-04
Supplement: Supplementary file 1 [file supplementary]

**Supplementary Figures**

Figure S1: UV-Visible spectra of aqueous dispersion of Ag and Ag@ZnO nanoparticles synthesized by chemical reduction and sonochemical technique respectively

Figure S2: XRD patterns of the Ag@ZnO core-shell nanoparticles synthesized by the sonochemical technique and heat treated for 2h at different temperatures

Figure S3: FTIR spectrum of Ag@ZnO core-shell nanoparticles synthesized by the sonochemical technique and dried at 80oC for 2 h

Figure S4: Room-temperature photoluminescence spectrum of Ag@ZnO core-shell nanoparticles synthesized by the sonochemical technique and dried at 80oC for 2 h

Figure S5: TEM (a) and HRTEM (b) images of Ag@ZnO nanoparticles synthesized by the sonochemical technique and dried at 80oC for 2 h

Figure S6: Nitrogen adsorption/desorption isotherms obtained at 77 K and inset shows the pore size distribution of the as-synthesized Ag@ZnO nanoparticles synthesized by the sonochemical technique and dried at 80oC for 2 h
